# Supplementary material
Source: MDPI journal article supplement (https://www.mdpi.com/2227-9040/11/2/94)
Supplement: s1 [file s1]

## Supporting Information

# Evaluation of the Transfer and Occurrence of Opium Alkaloids in Poppy Seed Teas Using Preconcentrations with $\mu$ SPEed<sup>®</sup> Followed by GC-MS Analysis

Gema Casado-Hidalgo <sup>1,2</sup>, Rosa Perestelo <sup>2</sup>, Sonia Morante-Zarcero <sup>1</sup>, José S. Câmara <sup>2,3,\*</sup> and Isabel Sierra <sup>1,\*</sup>

<sup>1</sup> Departamento de Tecnología Química y Ambiental, E.S.C.E.T, Universidad Rey Juan Carlos, C/Tulipán s/n, Móstoles, 28933 Madrid, Spain

<sup>2</sup> CQM-Madeira Chemical Centre, Universidade da Madeira, Campus da Penteada, 9020-105 Funchal, Portugal

<sup>3</sup> Department of Chemistry, Faculdade de Ciências Exactas e Engenharia, Universidade da Madeira, Campus da Penteada, 9020-105 Funchal, Portugal

\* Correspondence: jsc@staff.uma.pt (J.S.C.); isabel.sierra@urjc.es (I.S.)

**Table S1.** Registration of the different poppy seeds used to make tea infusion with their description, species and origin.

| Code | Description                                             | Specified specie by labelling | Cultivation type          | Origin        | Best-before date | Recommendations for use                          |
|------|---------------------------------------------------------|-------------------------------|---------------------------|---------------|------------------|--------------------------------------------------|
| S-1  | Physically: blue poppy seeds                            | <i>P. rhoeas</i>              | No ecological cultivation | Not specified | 01/2025          | Not specified                                    |
| S-2  | Physically: blue poppy seeds                            | <i>P. rhoeas</i>              | No ecological cultivation | Not specified | 12/07/2022       | 3 cups per days of 4 g of poppy seeds for 10 min |
| S-3  | Not specific on the label. Physically: blue poppy seeds | Not specified                 | Ecological cultivation    | Turkey        | 04/2025          | Not specified                                    |
| S-4  | Not specific on the label. Physically: blue poppy seeds | Not specified                 | No ecological cultivation | Not specified | 20/11/2022       | Not specified                                    |

**Table S2.** Summary of the number of transfer studies performed with the three factors under study and the two levels of each.

| RUN | Levels of each factor |            |            |
|-----|-----------------------|------------|------------|
|     | Temperature (°C)      | Amount (g) | Time (min) |
| 1   | 90                    | 2          | 5          |
| 2   | 90                    | 2          | 10         |
| 3   | 90                    | 4          | 5          |
| 4   | 90                    | 4          | 10         |
| 5   | 100                   | 2          | 5          |
| 6   | 100                   | 2          | 10         |
| 7   | 100                   | 4          | 5          |
| 8   | 100                   | 4          | 10         |
